# Supplementary material
Source: PubMed Central journal article supplement (PMC6378861)
Supplement: ioy216_supplemental_file.pdf [file ioy216_supplemental_file.pdf]

## **Supplementary Online Material**

### **TENASCIN-X IN AMNIOTIC FLUID AND REPRODUCTIVE TISSUE OF PREGNANCIES COMPLICATED BY INFECTION AND PRETERM PRELABOR RUPTURE OF MEMBRANES**

Kara M. Rood M.D., Catalin S. Buhimschi M.D., M.B.A, Guomao Zhao, B.Sc.,

Emily A. Oliver M.D., Taryn Summerfield, M.Sc., Mert Ozan Bahtiyar M.D.,

Irina A. Buhimschi M.D.

#### **Supplementary Data**

**Table S1.** Primary antibodies.

**Table S2.** Demographic clinical and outcome characteristics of the women who provided amniotic fluid samples for tenascin-X (n=334).

**Figure S1.** Flow diagram describing study groups, the number of samples and type of tissues used in this study.

This supplementary material has been provided by the authors to give readers additional information about their work.

**Table S1. Primary antibodies.**

| <b>Protein Target</b> | <b>Host</b> | <b>Vendor</b> | <b>Catalog #</b> | <b>RRID</b> | <b>Clonality</b>    | <b>Dilution</b> | <b>Usage</b> |
|-----------------------|-------------|---------------|------------------|-------------|---------------------|-----------------|--------------|
| tenascin-X            | sheep       | R&D Systems   | AF6999           | AB_10971774 | polyclonal antibody | 1:50            | IHC          |
| tenascin-X            | sheep       | R&D Systems   | AF6999           | AB_10971774 | polyclonal antibody | 1:200           | Western blot |
| CD45                  | rabbit      | Abcam         | ab10558          | AB_442810   | polyclonal antibody | 1:500           | IHC          |

*Abbreviation: IHC, immunohistochemistry*

**Table S2. Demographic clinical and outcome characteristics of the women who provided amniotic fluid samples for tenascin-X (n=334)**

| Variable                                       | 2nd trimester genetic amniocenteses<br>n=34 | 3rd trimester lung maturity amniocenteses<br>n=31 | Rule-out infection amniocenteses<br>n=269 | P value |
|------------------------------------------------|---------------------------------------------|---------------------------------------------------|-------------------------------------------|---------|
| <b><i>Characteristics at amniocentesis</i></b> |                                             |                                                   |                                           |         |
| Maternal age, years †                          | 34 [30 – 39]                                | 30 [26 – 34]                                      | 27 [22 – 33]                              | <0.001  |
| Parity †                                       | 0 [0 – 1]                                   | 1 [0 – 2]                                         | 1 [0 – 1]                                 | 0.018   |
| Gravidity †                                    | 2 [1 – 3]                                   | 3 [2 – 4]                                         | 2 [1 – 4]                                 | 0.384   |
| GA, weeks †                                    | 19 [17 – 20]                                | 36 [35 – 37]                                      | 27 [24 – 31]                              | <0.001  |
| Uterine contractions ‡                         | 0 (0)                                       | 0 (0)                                             | 127 (50)                                  | <0.001  |
| Cervical dilatation >3 cm ‡                    | 0 (0)                                       | 0 (0)                                             | 46 (18)                                   | 0.007   |
| PPROM ‡                                        | 0 (0)                                       | 0 (0)                                             | 98 (36)                                   | <0.001  |
| Clinical chorioamnionitis ‡                    | 0 (0)                                       | 0 (0)                                             | 19 (7)                                    | 0.153   |
| <b><i>Outcome characteristics</i></b>          |                                             |                                                   |                                           |         |
| Term delivery (≥37 weeks) ‡                    | 23 (100)                                    | 13 (52)                                           | 43 (17)                                   | <0.001  |
| Preterm birth at <34 weeks ‡                   | 0 (0)                                       | 0 (0)                                             | 204 (78)                                  | <0.001  |
| GA at delivery, weeks †                        | 39 [39 – 41]                                | 37 [36 – 37]                                      | 31 [26 – 33]                              | <0.001  |
| Amniocentesis-delivery time, days †            | 144 [137 – 156]                             | 2 [1 – 8]                                         | 2 [0 – 16]                                | <0.001  |

† Data presented as median [interquartile range] and analyzed by Kruskal-Wallis ANOVA on Ranks.

‡ Data presented as n (%) and analyzed by Chi square tests.

Abbreviations: PPRM, preterm premature rupture of membrane; GA, gestational age

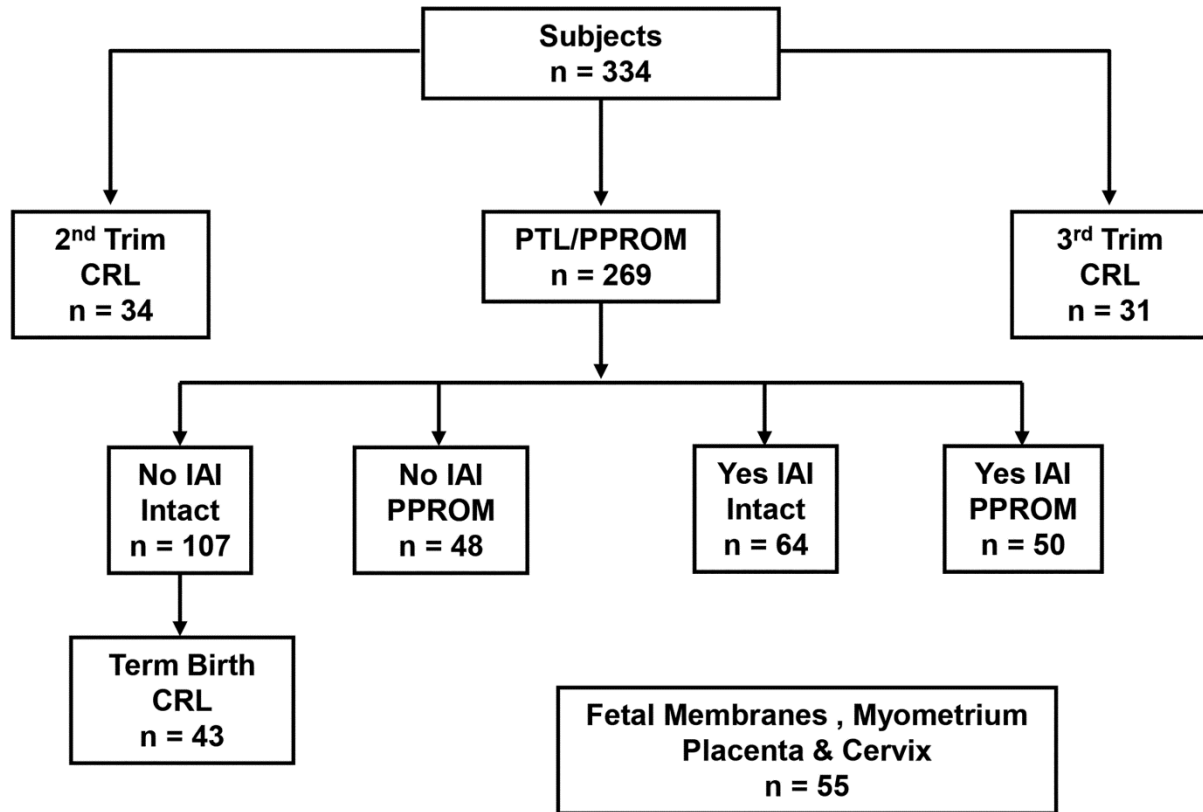

**Figure S1. Flow diagram describing study groups, the number of samples and type of tissues used in this study.** Trim, trimester; CRL, control; PTL, preterm labor; PPROM, preterm prelabor rupture of membranes; IAI, intra-amniotic infection/inflammation.
